# Supplementary material for: A Prospective Study of Fruit Juice Consumption and the Risk of Overall and Cardiovascular Disease Mortality
Source: MDPI journal article supplement (doi:10.3390/nu14102127), 2022-05-19
Supplement: s1 [file s1]

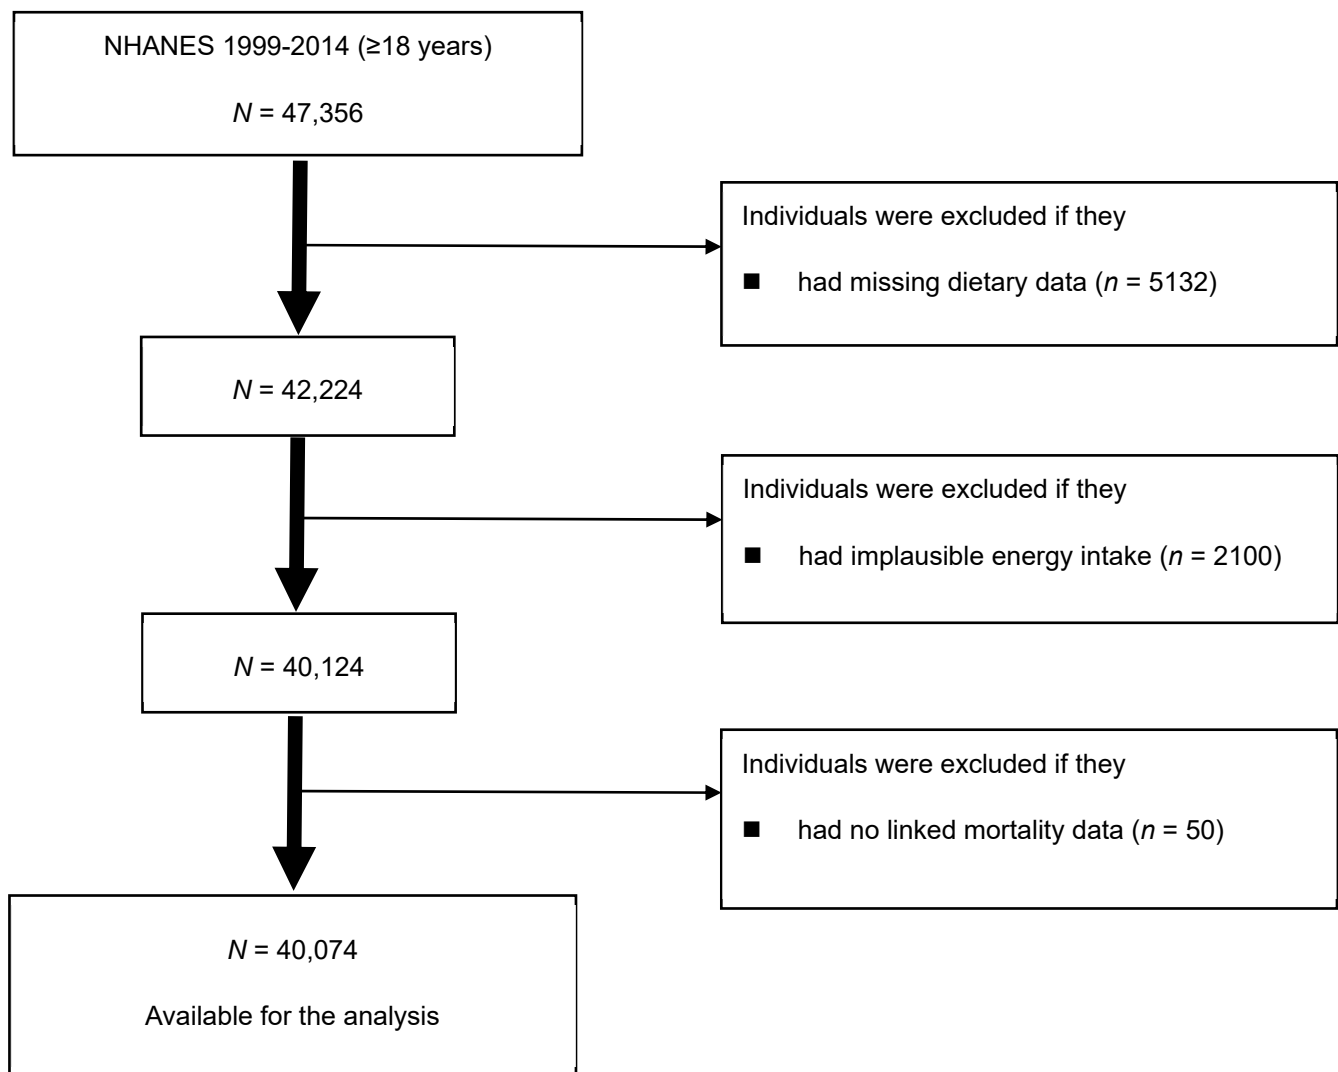

**Figure S1.** Flow chart of selection of participants in this analysis. NHANES, National Health and Nutrition Examination Survey.

**Table S1.** Food codes of 100% fruit juice in NHANES (1999-2014)

| <b>100% Fruit Juice</b>       | <b>Food Code</b> | <b>Description</b>                                 |
|-------------------------------|------------------|----------------------------------------------------|
| Grapefruit juice, 100%        | 61201010         | Freshly squeezed                                   |
|                               | 61201020         | NS as to form                                      |
|                               | 61201220         | Canned, bottled or in a carton                     |
|                               | 61201225         | With calcium added                                 |
|                               | 61201620         | Frozen, reconstituted                              |
| Lemon juice, 100%             | 61204000         | NS as to form                                      |
|                               | 61204010         | Freshly squeezed                                   |
|                               | 61204200         | Canned or bottled                                  |
| Lime juice, 100%              | 61207000         | NS as to form                                      |
|                               | 61207010         | Freshly squeezed                                   |
|                               | 61207200         | Canned or bottled                                  |
| Orange juice, 100%            | 61210000         | NFS                                                |
|                               | 61210010         | Freshly squeezed                                   |
|                               | 61210220         | Canned bottled or in a carton                      |
|                               | 61210250         | With calcium added, canned, bottled or in a carton |
|                               | 61210620         | Frozen reconstituted                               |
|                               | 61210720         | Frozen, not reconstituted                          |
|                               | 61210820         | With calcium added, frozen reconstituted           |
| Tangerine juice, 100%         | 61213220         | -                                                  |
| Fruit juice blend, 100% juice | 61213800         | Citrus                                             |
|                               | 61213900         | Citrus, with calcium added                         |
|                               | 64100110         | -                                                  |
| Cranberry juice blend, 100%   | 64100200         | -                                                  |
|                               | 64100220         | With calcium added                                 |
| Apple juice, 100%             | 64104010         | -                                                  |

|                           |          |                    |   |
|---------------------------|----------|--------------------|---|
|                           | 64104030 | With calcium added |   |
| Blackberry juice, 100%    | 64104600 |                    | - |
| Cranberry juice, 100%     | 64105400 | Not a blend        |   |
| Grape juice, 100%         | 64116020 |                    | - |
|                           | 64116060 | With calcium added |   |
| Papaya juice, 100%        | 64120010 |                    | - |
| Passion fruit juice, 100% | 64121000 |                    | - |
| Pineapple juice, 100%     | 64124020 |                    | - |
| Pomegranate juice, 100%   | 64126000 |                    | - |
| Prune juice, 100%         | 64132010 |                    | - |
| Strawberry juice, 100%    | 64132500 |                    | - |
| Watermelon juice, 100%    | 64133100 |                    | - |

NHANES, National Health and Nutrition Examination Survey; NS, Not specified; NFS, Not further specified.

**Table S2.** Food codes of total fruit juice in NHANES (1999-2014)

| <b>Total Fruit Juice</b> | <b>Food Code</b> | <b>Description</b>                                                     |
|--------------------------|------------------|------------------------------------------------------------------------|
| Citrus fruit juice       | 61200500         | Acerola juice                                                          |
|                          | 61201000         | Grapefruit juice, NFS                                                  |
|                          | 61201010         | Grapefruit juice, 100%, freshly squeezed                               |
|                          | 61201020         | Grapefruit juice, 100%, NS as to form                                  |
|                          | 61201220         | Grapefruit juice, 100%, canned, bottled or in a carton                 |
|                          | 61201225         | Grapefruit juice, 100%, with calcium added                             |
|                          | 61201230         | Grapefruit juice, canned, bottled, carton, with sugar                  |
|                          | 61201620         | Grapefruit juice, 100%, frozen, reconstituted                          |
|                          | 61201630         | Grapefruit juice, frozen, with sugar (reconstituted)                   |
|                          | 61204000         | Lemon juice, 100%, NS as to form                                       |
|                          | 61204010         | Lemon juice, 100%, freshly squeezed                                    |
|                          | 61204200         | Lemon juice, 100%, canned or bottled                                   |
|                          | 61204600         | Lemon juice, frozen                                                    |
|                          | 61207000         | Lime juice, 100%, NS as to form                                        |
|                          | 61207010         | Lime juice, 100%, freshly squeezed                                     |
|                          | 61207200         | Lime juice, 100%, canned or bottled                                    |
|                          | 61207600         | Lime juice, frozen                                                     |
|                          | 61210000         | Orange juice, 100%, NFS                                                |
|                          | 61210010         | Orange juice, 100%, freshly squeezed                                   |
|                          | 61210220         | Orange juice, 100%, canned, bottled or in a carton                     |
|                          | 61210230         | Orange juice, canned/bottled/carton, with sugar                        |
|                          | 61210250         | Orange juice, 100%, with calcium added, canned, bottled or in a carton |
|                          | 61210620         | Orange juice, 100%, frozen, reconstituted                              |
|                          | 61210630         | Orange juice, frozen, with sugar, reconstituted with water             |

|          |                                                                                               |
|----------|-----------------------------------------------------------------------------------------------|
| 61210720 | Orange juice, 100%, frozen, not reconstituted                                                 |
| 61210730 | Orange juice, frozen, with sugar, not reconstituted                                           |
| 61210820 | Orange juice, 100%, with calcium added, frozen, reconstituted                                 |
| 61213000 | Tangerine juice, NFS                                                                          |
| 61213220 | Tangerine juice, 100%                                                                         |
| 61213230 | Tangerine juice, canned, with sugar                                                           |
| 61213620 | Tangerine juice, frozen (reconstituted with water)                                            |
| 61213800 | Fruit juice blend, citrus, 100% juice                                                         |
| 61213900 | Fruit juice blend, citrus, 100% juice, with calcium added                                     |
| 61214000 | Grape-tangerine-lemon juice                                                                   |
| 61216000 | Grapefruit and orange juice, NFS                                                              |
| 61216010 | Grapefruit and orange juice, fresh                                                            |
| 61216220 | Grapefruit and orange juice, canned                                                           |
| 61216230 | Grapefruit and orange juice, canned, with sugar                                               |
| 61216620 | Grapefruit and orange juice, frozen (reconstituted with water)                                |
| 61219000 | Orange and banana juice                                                                       |
| 61219100 | Pineapple-orange-banana juice                                                                 |
| 61219150 | Orange-white grape-peach juice                                                                |
| 61219650 | Apricot-orange juice                                                                          |
| 61222000 | Pineapple-grapefruit juice, NFS                                                               |
| 61222200 | Pineapple-grapefruit juice, canned, bottled or in a carton, NS as to sweetened or unsweetened |
| 61222220 | Pineapple-grapefruit juice, canned, bottled or in a carton, unsweetened                       |
| 61222230 | Pineapple-grapefruit juice, canned, bottled or in a carton, with sugar                        |
| 61222600 | Pineapple-grapefruit juice, frozen (reconstituted with water)                                 |

|          |                                                                                                          |
|----------|----------------------------------------------------------------------------------------------------------|
| 61225000 | Pineapple-orange juice, NFS                                                                              |
| 61225200 | Pineapple-orange juice, canned, NS as to sweetened or unsweetened; sweetened, NS as to type of sweetener |
| 61225220 | Pineapple-orange juice, canned, bottled or in a carton                                                   |
| 61225230 | Pineapple-orange juice, canned, with sugar                                                               |
| 61225600 | Pineapple-orange juice, frozen (reconstituted with water)                                                |
| 61226000 | Strawberry-banana-orange juice                                                                           |

---

|                               |          |                                                       |
|-------------------------------|----------|-------------------------------------------------------|
| Fruit juice, excluding citrus | 64100100 | Fruit juice, NFS                                      |
|                               | 64100110 | Fruit juice blend, 100% juice                         |
|                               | 64100120 | Ambrosia juice                                        |
|                               | 64100200 | Cranberry juice blend, 100% juice                     |
|                               | 64100220 | Cranberry juice blend, 100% juice, with calcium added |
|                               | 64101010 | Apple cider                                           |
|                               | 64104010 | Apple juice, 100%                                     |
|                               | 64104030 | Apple juice, 100%, with calcium added                 |
|                               | 64104050 | Apple juice, with added vitamin c                     |
|                               | 64104090 | Apple juice with added vitamin c and calcium          |
|                               | 64104150 | Apple-cherry juice                                    |
|                               | 64104200 | Apple-pear juice                                      |
|                               | 64104450 | Apple-raspberry juice                                 |
|                               | 64104500 | Apple-grape juice                                     |
|                               | 64104550 | Apple-grape-raspberry juice                           |
|                               | 64104600 | Blackberry juice, 100%                                |
|                               | 64104610 | Blueberry juice                                       |
|                               | 64105400 | Cranberry juice, 100%, not a blend                    |
|                               | 64105500 | Cranberry-white grape juice mixture, unsweetened      |
|                               | 64116010 | Grape juice, NFS                                      |

|          |                                                                               |
|----------|-------------------------------------------------------------------------------|
| 64116020 | Grape juice, 100%                                                             |
| 64116030 | Grape juice, with sugar                                                       |
| 64116040 | Grape juice, low calorie sweetener                                            |
| 64116050 | Grape juice, NS as to sweetened, with added vitamin c                         |
| 64116060 | Grape juice, 100%, with calcium added                                         |
| 64116100 | Grape juice, unsweetened, with added vitamin c                                |
| 64116150 | Grape juice, with sugar, with added vitamin c                                 |
| 64120010 | Papaya juice, 100%                                                            |
| 64121000 | Passion fruit juice, 100%                                                     |
| 64122030 | Peach juice, with sugar                                                       |
| 64123000 | pear-white-grape-passion fruit juice, with added vitamin c                    |
| 64124010 | Pineapple juice, NS as to sweetened                                           |
| 64124020 | Pineapple juice, 100%                                                         |
| 64124030 | Pineapple juice, with sugar                                                   |
| 64124060 | Pineapple juice, unsweetened, with vitamin c                                  |
| 64124200 | Pineapple-apple-guava juice, with added vitamin c                             |
| 64125000 | Pineapple juice-non-citrus juice blend, unsweetened, with added vitamin c     |
| 64126000 | Pomegranate juice, 100%                                                       |
| 64132010 | Prune juice, 100%                                                             |
| 64132020 | Prune juice, unsweetened                                                      |
| 64132030 | Prune juice, with sugar                                                       |
| 64132500 | Strawberry juice, 100%                                                        |
| 64133100 | Watermelon juice, 100%                                                        |
| 64134000 | Fruit smoothie drink, made with fruit or fruit juice only (no dairy products) |
| 64134015 | Fruit smoothie, with whole fruit, no dairy                                    |
| 64134020 | Fruit smoothie, with whole fruit, no dairy, added protein                     |

|                                                |          |                                                                               |
|------------------------------------------------|----------|-------------------------------------------------------------------------------|
|                                                | 64134025 | Fruit smoothie, with whole fruit, non-dairy                                   |
|                                                | 64134030 | Fruit smoothie juice drink, no dairy                                          |
|                                                | 64134100 | Fruit smoothie, light                                                         |
|                                                | 64134200 | Fruit smoothie, bottled                                                       |
| Fruit juice and fruit juice mixtures baby food | 67202000 | Apple juice, baby food                                                        |
|                                                | 67202010 | Apple juice, with added calcium, baby food                                    |
|                                                | 67203000 | Apple-fruit juice blend, baby food                                            |
|                                                | 67203200 | Apple-banana juice, baby food                                                 |
|                                                | 67203400 | Apple-cherry juice, baby food                                                 |
|                                                | 67203450 | Apple-cranberry juice, baby food                                              |
|                                                | 67203500 | Apple-grape juice, baby food                                                  |
|                                                | 67203510 | Apple-grape juice, baby, with calcium                                         |
|                                                | 67203600 | Apple-peach juice, baby food                                                  |
|                                                | 67203700 | Apple-prune juice, baby food                                                  |
|                                                | 67203800 | Grape juice, baby food                                                        |
|                                                | 67203900 | Mango-grape-pear juice, baby                                                  |
|                                                | 67204000 | Mixed fruit juice, not citrus, baby food                                      |
|                                                | 67204100 | Mixed fruit juice, not citrus, with added calcium, baby food                  |
|                                                | 67205000 | Orange juice, baby food                                                       |
|                                                | 67211000 | Orange-apple-banana juice, baby food                                          |
|                                                | 67212000 | Pear juice, baby food                                                         |
|                                                | 67230000 | Apple-sweet potato juice, baby food                                           |
|                                                | 67230500 | Orange-carrot juice, baby food                                                |
|                                                | 67250100 | Banana juice with low-fat yogurt, baby food                                   |
|                                                | 67250150 | Mixed fruit juice with low-fat yogurt, baby food                              |
|                                                | 67260000 | Fruit juice and water drink, with high vitamin c and added calcium, baby food |

NHANES, National Health and Nutrition Examination Survey; NS, Not specified; NFS, Not further specified.



**Table S3.** HRs (95% CIs) for mortality risk according to each 100 g/day increase in intake of 100% orange juice and 100% citrus juice in NHANES (1999-2014)

| Cause of death                           | HR (95% CI)       |                   |
|------------------------------------------|-------------------|-------------------|
|                                          | 100% orange juice | 100% citrus juice |
| <b>All-cause mortality</b>               |                   |                   |
| Model 1 <sup>a</sup>                     | 1.04 (0.97-1.10)  | 1.03 (0.97-1.10)  |
| Model 2 <sup>b</sup>                     | 1.07 (1.02-1.11)  | 1.07 (1.02-1.11)  |
| <b>CVD mortality</b>                     |                   |                   |
| Model 1 <sup>a</sup>                     | 1.00 (0.91-1.10)  | 0.99 (0.90-1.08)  |
| Model 2 <sup>b</sup>                     | 1.04 (0.96-1.12)  | 1.03 (0.95-1.10)  |
| <b>Heart disease mortality</b>           |                   |                   |
| Model 1 <sup>a</sup>                     | 0.97 (0.88-1.08)  | 0.96 (0.87-1.07)  |
| Model 2 <sup>b</sup>                     | 1.00 (0.92-1.09)  | 0.99 (0.91-1.08)  |
| <b>Cerebrovascular disease mortality</b> |                   |                   |
| Model 1 <sup>a</sup>                     | 1.13 (1.00-1.26)  | 1.11 (0.99-1.24)  |
| Model 2 <sup>b</sup>                     | 1.18 (1.05-1.32)  | 1.16 (1.04-1.30)  |

CIs, Confidence intervals; CVD, Cardiovascular diseases; HRs, Hazard ratios; NHANES, National Health and Nutrition Examination Survey.

<sup>a</sup>Covariates adjusted in the model 1 were the same as those in model 1 in **Table 2** (see **Table 2** footnote);

<sup>b</sup>Covariates adjusted in the model 2 were the same as those in model 2 in **Table 2** (see **Table 2** footnote).

**Table S4.** Sensitivity analyses on association between consumption of fruit juice with the risk of all-cause mortality in NHANES (1999-2014)<sup>a</sup>

|                                       | Fruit juice (g/day) |                  |                  |                  | Per 100 g/day increase | <i>P</i> <sub>trend</sub> <sup>e</sup> |
|---------------------------------------|---------------------|------------------|------------------|------------------|------------------------|----------------------------------------|
|                                       | 0                   | 1 to 124         | 125 to 249       | ≥250             |                        |                                        |
| <b>100% fruit juice (g/day)</b>       |                     |                  |                  |                  |                        |                                        |
| Sensitivity analysis I <sup>b</sup>   |                     |                  |                  |                  |                        |                                        |
| No. of participants                   | 17,655              | 4,105            | 3,194            | 2,626            |                        |                                        |
| No. of deaths/person-years            | 1,503/115,115       | 449/26,796       | 372/21,868       | 212/18,620       |                        |                                        |
| HR (95% CI)                           | 1 (Reference)       | 1.18 (1.01-1.37) | 1.13 (0.93-1.37) | 1.27 (1.04-1.56) | 1.07 (1.03-1.11)       | 0.002                                  |
| Sensitivity analysis III <sup>c</sup> |                     |                  |                  |                  |                        |                                        |
| No. of participants                   | 22,662              | 3,859            | 3,277            | 3,560            |                        |                                        |
| No. of deaths/person-years            | 1,770/192,704       | 315/28,678       | 294/26,598       | 250/32,278       |                        |                                        |
| Model                                 | 1 (Reference)       | 1.22 (1.02-1.47) | 1.13 (0.93-1.38) | 1.28 (1.01-1.61) | 1.07 (1.03-1.11)       | 0.001                                  |
| Sensitivity analysis IV <sup>d</sup>  |                     |                  |                  |                  |                        |                                        |
| No. of participants                   | 26,212              | 4,602            | 3,984            | 3,968            |                        |                                        |
| No. of deaths/person-years            | 2,360/221,503       | 450/34,355       | 477/32,111       | 309/35,819       |                        |                                        |
| Model                                 | 1 (Reference)       | 1.09 (0.93-1.28) | 1.17 (0.98-1.38) | 1.19 (0.98-1.45) | 1.05 (1.01-1.09)       | 0.010                                  |
| <b>Total fruit juice (g/day)</b>      |                     |                  |                  |                  |                        |                                        |
| Sensitivity analysis I <sup>b</sup>   |                     |                  |                  |                  |                        |                                        |
| No. of participants                   | 17,271              | 4,130            | 3,338            | 2,841            |                        |                                        |
| No. of deaths/person-years            | 1,479/112,382       | 452/26,984       | 379/22,800       | 226/20,234       |                        |                                        |
| HR (95% CI)                           | 1 (Reference)       | 1.17 (1.00-1.35) | 1.12 (0.93-1.35) | 1.25 (1.02-1.52) | 1.06 (1.02-1.11)       | 0.003                                  |
| Sensitivity analysis III <sup>c</sup> |                     |                  |                  |                  |                        |                                        |
| No. of participants                   | 22,117              | 3,881            | 3,444            | 3,916            |                        |                                        |
| No. of deaths/person-years            | 1,737/187,480       | 316/28,885       | 305/27,992       | 271/35,900       |                        |                                        |
| Model                                 | 1 (Reference)       | 1.21 (1.00-1.46) | 1.13 (0.93-1.36) | 1.24 (0.99-1.57) | 1.06 (1.02-1.10)       | 0.002                                  |

Sensitivity analysis IV<sup>d</sup>

|                            |               |                  |                  |                  |                  |       |
|----------------------------|---------------|------------------|------------------|------------------|------------------|-------|
| No. of participants        | 25,605        | 4,626            | 4,179            | 4,356            |                  |       |
| No. of deaths/person-years | 2,312/215,722 | 453/34,533       | 492/33,768       | 339/39,765       |                  |       |
| Model                      | 1 (Reference) | 1.09 (0.93-1.27) | 1.13 (0.96-1.38) | 1.16 (0.97-1.41) | 1.04 (1.01-1.08) | 0.026 |

CIs, Confidence intervals; HRs, Hazard ratios; METS, Metabolic equivalent tasks; NHANES, National Health and Nutrition Examination Survey.

<sup>a</sup>Covariates adjusted in the models were the same as those in model 2 in **Table 2** (see **Table 2** footnote);

<sup>b</sup>Sensitivity analysis upon the exclusion of individuals who had a single 24-hour dietary recall;

<sup>c</sup>Sensitivity analysis within individuals who were free of any history of congestive heart failure, angina pectoris, coronary heart disease, heart attack, stroke, cancer, or diabetes at baseline;

<sup>d</sup>Sensitivity analysis upon the exclusion of individuals who died within 3 years after dietary assessment;

<sup>e</sup>Linear trend test was conducted by treating 100% or total fruit juice as continuous variable in the model.
